# Supplementary figures and images for: Screening and Characterization of Antioxidant Film Applicable to Walnut Kernels from Juglans sigillata
Source: MDPI journal article supplement (doi:10.3390/foods13091313), 2024-04-25

## Supplementary Material

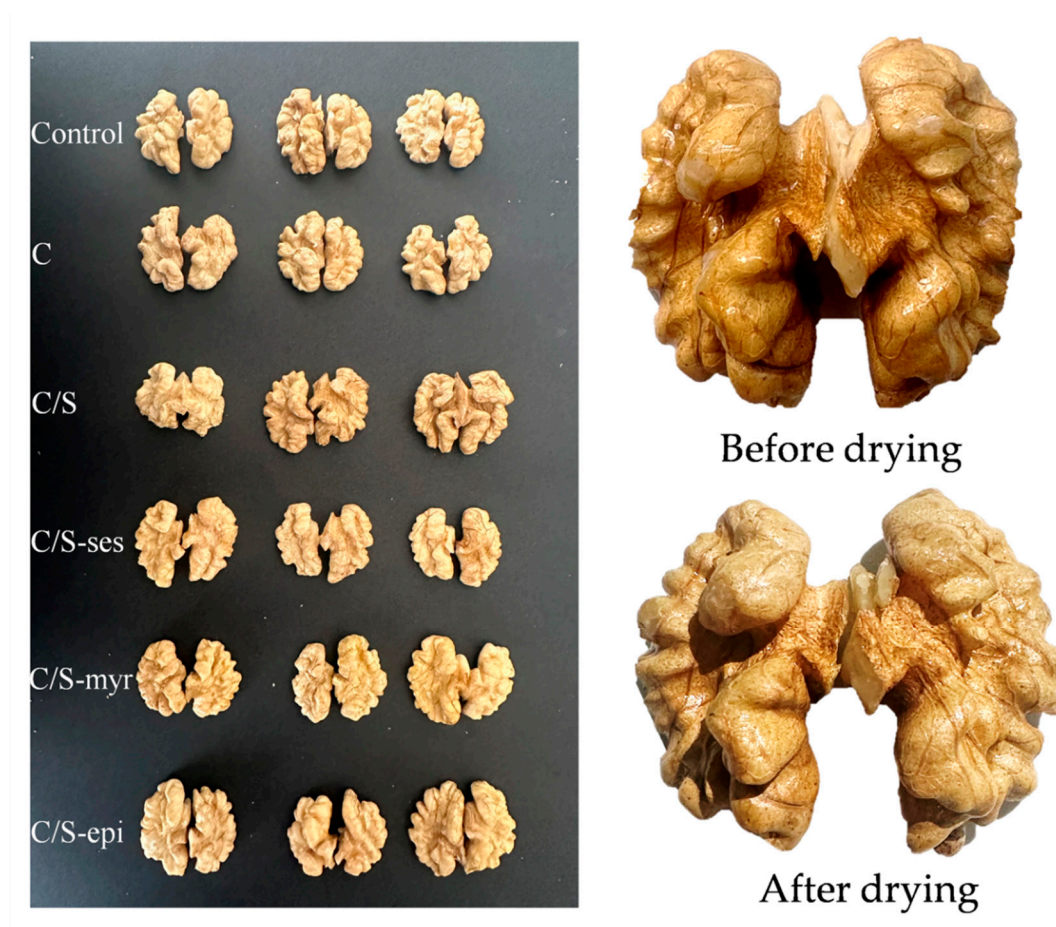

**Figure S1.** The coated walnut kernels.

Supplement: s1 [file s1]
